# Supplementary material
Source: Elsevier journal article supplement (http://www.damasceneblog.com/mmc1.pdf)
Supplement: mmc1 [file mmc1.pdf]

## In solidarity with Gaza List of signatories

Ferheen Shamim, Albany Medical College; Michael Berlin, Albert Einstein College of Medicine; Mandeep Cheema, Albert Einstein College of Medicine; Rachel Fremont, Albert Einstein College of Medicine; Surah Grumet, Albert Einstein College of Medicine; Ehsan Jazini, Albert Einstein College of Medicine; Enko Kiprilov, Albert Einstein College of Medicine; Yamileth Martinez, Albert Einstein College of Medicine; Stefan Muehlbauer, Albert Einstein College of Medicine; Daniel O'Neil, Albert Einstein College of Medicine; Mia Shapiro, Albert Einstein College of Medicine; Saira Alimohamed, Alpert Medical School of Brown University; Thelma Claire Alleyne, Alpert Medical School of Brown University; Sonia Aneja, Alpert Medical School of Brown University; Atena Asiaii, Alpert Medical School of Brown University; Michelle Bravo, Alpert Medical School of Brown University; Querida Campbell, Alpert Medical School of Brown University; Alicia Carranza, Alpert Medical School of Brown University; Flavio Casoy, Alpert Medical School of Brown University; Candace Coleman, Alpert Medical School of Brown University; Gul Dolen, Alpert Medical School of Brown University; Zachary Ginsberg, Alpert Medical School of Brown University; Ryan Graddy, Alpert Medical School of Brown University; Isaac Howley, Alpert Medical School of Brown University; Joel Huleatt, Alpert Medical School of Brown University; Joelle Karlik, Alpert Medical School of Brown University; Lamia Khan, Alpert Medical School of Brown University; Salman Khan, Alpert Medical School of Brown University; Bonnie Lau, Alpert Medical School of Brown University; Albert Lin, Alpert Medical School of Brown University; Marina MacNamara, Alpert Medical School of Brown University; Ross Martini, Alpert Medical School of Brown University; Zara Mathews, Alpert Medical School of Brown University; Marie Nguyen, Alpert Medical School of Brown University; Greg Radin, Alpert Medical School of Brown University; Sareh Rajaei, Alpert Medical School of Brown University; Jack Rusley, Alpert Medical School of Brown University; Dan Schwarz, Alpert Medical School of Brown University; Dhvani Shah, Alpert Medical School of Brown University; Ammar Shaikhouni, Alpert Medical School of Brown University; Jesse Soodalter, Alpert Medical School of Brown University; Stephanie Tecun, Alpert Medical School of Brown University; Peter Than, Alpert Medical School of Brown University; Sarah Wakeman, Alpert Medical School of Brown University; Heidi Wilder, Alpert Medical School of Brown University; Nusrat Zaman, Alpert Medical School of Brown University; Ali Zarrabi, Alpert Medical School of Brown University; Kavya Rao, American University of Antigua College of Medicine; Meha Varma, American University of Antigua College of Medicine; Ali Azeem, American University of the Caribbean; Cynthia Krueger, AT Still University; Tarek El Ahmadi, Beirut Arab University; Vinay Aggarwal, Boston University School of Medicine; Melanie Andersen, Boston University School of Medicine; Yoon-Soo Bae, Boston University School of Medicine; Aylin Bilgutay, Boston University School of Medicine; Celina Cepeda, Boston University School of Medicine; Kevin Chapla, Boston University School of Medicine; Andrew Chrisman, Boston University School of Medicine; Caitlin Christie, Boston University School of Medicine; Frank Coughlin, Boston University School of Medicine; Albert Do, Boston University School of Medicine; Joseph Donahue, Boston University School of Medicine; Bellfield Edward, Boston University School of Medicine; Sridevi Ellickal, Boston University School of Medicine; Anahita Fallahi, Boston University School of Medicine; Danielle Farrar, Boston University School of Medicine; Robert Feeley, Boston University School of Medicine; Robert Freilich, Boston University School of Medicine; Joanna Gan, Boston University School of Medicine; Anish Geevarghese, Boston University School of Medicine; Jessica Gereige, Boston University School of Medicine; Doreen Gidali, Boston University School of Medicine; Francisco Giral-Irby, Boston University School of Medicine; Amelia Haas, Boston University School of Medicine; Sara Haidar, Boston University School of Medicine; Roxane Handal, Boston University School of Medicine; Frank Hao, Boston University School of Medicine; Aniruddha Hazra, Boston University School of Medicine; Jennifer Hensley, Boston University School of Medicine; Lauren Hittson,

Boston University School of Medicine; Sumaya Huque, Boston University School of Medicine; Tara Kantharaj, Boston University School of Medicine; Naima Khamsi, Boston University School of Medicine; Alexander Lankowski, Boston University School of Medicine; James Leshner, Boston University School of Medicine; Lina Nazartchouk, Boston University School of Medicine; Haig Panossian, Boston University School of Medicine; Victor Polshin, Boston University School of Medicine; Stephanie Portes, Boston University School of Medicine; Vassiliki Pravodelov, Boston University School of Medicine; Ruju Rai, Boston University School of Medicine; Patel Rajesh, Boston University School of Medicine; Samara Rifkin, Boston University School of Medicine; Charlena Robinson, Boston University School of Medicine; James Saint John, Boston University School of Medicine; Max Seaton, Boston University School of Medicine; Ryan Seibert, Boston University School of Medicine; Athul Seshadri, Boston University School of Medicine; Ankur Shah, Boston University School of Medicine; Neil Shah, Boston University School of Medicine; Paramjit Singh, Boston University School of Medicine; David Stepien, Boston University School of Medicine; Samir Sur, Boston University School of Medicine; Jeffrey Tan, Boston University School of Medicine; Nannan Thirumavalavan, Boston University School of Medicine; Ming Tsao, Boston University School of Medicine; Jin Xu, Boston University School of Medicine; Huai Jen Yang, Boston University School of Medicine; Reem Alkadhii, Brody School of Medicine at East Carolina University; Lynda Bridges, Brody School of Medicine at East Carolina University; Marcus Carden, Brody School of Medicine at East Carolina University; Joshua Corsa, Brody School of Medicine at East Carolina University; Matthew Draughon, Brody School of Medicine at East Carolina University; Brandy Edwards, Brody School of Medicine at East Carolina University; Victoria Elliot, Brody School of Medicine at East Carolina University; Brooke Frankel, Brody School of Medicine at East Carolina University; Kyle Geissler, Brody School of Medicine at East Carolina University; Elena Grebenciuova, Brody School of Medicine at East Carolina University; Jose Hernandez, Brody School of Medicine at East Carolina University; Bryan Howington, Brody School of Medicine at East Carolina University; Heath Jones, Brody School of Medicine at East Carolina University; Eva Kyritsis, Brody School of Medicine at East Carolina University; Aadil Lodhi, Brody School of Medicine at East Carolina University; Adnan Mustafa, Brody School of Medicine at East Carolina University; Michael Ritchie, Brody School of Medicine at East Carolina University; Lily Rogers, Brody School of Medicine at East Carolina University; Oussama Saleh, Brody School of Medicine at East Carolina University; Rita Sridaran, Brody School of Medicine at East Carolina University; Anita Unnithan, Brody School of Medicine at East Carolina University; Jennifer Vu, Brody School of Medicine at East Carolina University; Laura Janneck, Case Western Reserve University School of Medicine; Constance Liu, Case Western Reserve University School of Medicine; Neeta Makhija, Case Western Reserve University School of Medicine; Peter Moyer, Case Western Reserve University School of Medicine; Neeral Sheth, Chicago College of Osteopathic Medicine; Alida Gertz, Cleveland Clinic/Case Western Reserve University School of Medicine; Benjamin Bodnar, Columbia University College of Physicians and Surgeons; Sarah Goglin, Columbia University College of Physicians and Surgeons; Andres Mendez, Columbia University College of Physicians and Surgeons; Maxwell Merkow, Columbia University College of Physicians and Surgeons; Haitham Ahmed, Dartmouth Medical School; Omri Ayalon, Dartmouth Medical School; Samuel Bakhoum, Dartmouth Medical School; Patrick Coady, Dartmouth Medical School; Pete Harris, Dartmouth Medical School; Matthew Ippolito, Dartmouth Medical School; Ryan Jaber, Dartmouth Medical School; Emory Liscord, Dartmouth Medical School; Nicole Montgomery, Dartmouth Medical School; Dieu-Thi Nguyen, Dartmouth Medical School; Purak Parikh, Dartmouth Medical School; Katie Ratzan, Dartmouth Medical School; Jill Rosno, Dartmouth Medical School; Shahla Syed, Dartmouth Medical School; Laura Yasaitis, Dartmouth Medical School; Amber Bird, Drexel University College of Medicine; Vincent Carson, Drexel University College of Medicine;

Neil Devani, Drexel University College of Medicine; Karalynn Ottersness, Drexel University College of Medicine; Adam Raphael Rom, Drexel University College of Medicine; Vanessa Jessop, Edinburgh; Ammara Abbasi, Emory University School of Medicine; Arielle Lutterman, Emory University School of Medicine; Gopi Mohan, Emory University School of Medicine; Kimberley Neroda, Emory University School of Medicine; Ankoor Shah, Emory University School of Medicine; Praneetha Thulasi, Emory University School of Medicine; Kim Traxinger, Emory University School of Medicine; Thomas Zorn, Emory University School of Medicine; Loes de Kleijn, Erasmus University Rotterdam, the Netherlands; Shaila Siraj, Florida State University; Diana Livermore, George Washington University School of Medicine & Health Sciences; Phil Zhang, Georgetown University School of Medicine; Sahin Khaniyev, Hacettepe University; Sheila Abdallah, Harvard Medical School; Danielle Alkov, Harvard Medical School; Deema Arafah, Harvard Medical School; Sylvan Baca, Harvard Medical School; Omar Badri, Harvard Medical School; Jasmine Barrow, Harvard Medical School; Elijah Bell, Harvard Medical School; Erin Bettendorf, Harvard Medical School; Dylan Carney, Harvard Medical School; Charles Carspecken, Harvard Medical School; Andrew Chalupka, Harvard Medical School; Morgan Chessia, Harvard Medical School; Alexandra Clifton, Harvard Medical School; Christy Comeaux, Harvard Medical School; Christina Cruz, Harvard Medical School; Aretha Delight Davis, Harvard Medical School; Sanjay Divakaran, Harvard Medical School; Huma Farid, Harvard Medical School; Stephen Fiascone, Harvard Medical School; Julia Fleming, Harvard Medical School; Alison Hwong, Harvard Medical School; Shani Isaac, Harvard Medical School; Onyinye Iweala, Harvard Medical School; Selena Jorgensen, Harvard Medical School; Elinore Kaufman, Harvard Medical School; Ibrahim Khansa, Harvard Medical School; David Kim, Harvard Medical School; Joseph Lopez, Harvard Medical School; Karolina Maciag, Harvard Medical School; Mayce Mansour, Harvard Medical School; Farhan Merali, Harvard Medical School; Anthony Muiru, Harvard Medical School; Benjamin Oldfield, Harvard Medical School; Andrés Patiño, Harvard Medical School; Derek Peters, Harvard Medical School; Rameez Qudsi, Harvard Medical School; Ali Qureshi, Harvard Medical School; Vanessa Redditt, Harvard Medical School; Etienne Reyes, Harvard Medical School; Lindsay Ryan, Harvard Medical School; Amy Saltzman, Harvard Medical School; Shamsher Samra, Harvard Medical School; Lekshmi Santhosh, Harvard Medical School; Jane Serene, Harvard Medical School; Anjana Sharma, Harvard Medical School; Masih Shinwa, Harvard Medical School; Judah Slavkovsky, Harvard Medical School; Lauren Steffel, Harvard Medical School; Tomasz Stryjewski, Harvard Medical School; Kimberly Sue, Harvard Medical School; Jonathan Takahashi, Harvard Medical School; Sam Takvorian, Harvard Medical School; David Tian, Harvard Medical School; Luis Ticona, Harvard Medical School; Leila Vaez-Azizi, Harvard Medical School; Kathleen Wakeham, Harvard Medical School; Sarah Zaman, Harvard Medical School; Jane Zhu, Harvard Medical School; Aliyah Shivji, Harvard School of Dental Medicine; Sukant Mittal, Harvard University/ MIT/ Mass. General Hospital; Omar Shaikh, Imperial College London School of Medicine; Taha Qazi, Indiana University School of Medicine; Tripathi Mohan, Jefferson Medical College; Julian Aldwin, Jenderal Soedirman University - ISMKI; Amir Mohareb, Johns Hopkins School of Medicine; Sangini Shah, Johns Hopkins School of Medicine; Reem Alhawass, KFU; Jessica Rush, Leeds Medical School; Mariam Rodmall, Leiden University; Chris Curry, Loyola University Stritch School of Medicine; Ruben Frescas, Loyola University Stritch School of Medicine; Nathan Kittle, Loyola University Stritch School of Medicine; Durgaprasad Sapalya, Manipal University; Malini DeSilva, Mayo Medical School; Jennifer Hulme, McGill University; Zoe Costa-von Aesch, McGill University Faculty of Medicine; Nazlie Faridi, McGill University Faculty of Medicine; Lauren Hamlin-Douglas, McGill University Faculty of Medicine; Caroline Skolnik, McGill University Faculty of Medicine; Taha Bandukwala, McMaster University School of Medicine; Tiffaney Krushel, McMaster University School of Medicine; Leslie Lappalainen, McMaster University School of Medicine; Michelle Thielmann, McMaster University School of Medicine; Joshua Wales, McMaster University School of Medicine; Joshua Wales, McMaster University School of Medicine; Zubair Chao, Medical College of Georgia; Mahnaz Farouqi, Medical College of Georgia; Nadeem Fatteh, Medical College of Georgia; Pedram Javanmard, Medical College of Georgia; Aneel Naeem, Medical College of Georgia; Farah Quyyumi, Medical College of Georgia; Rachel Pope, Medical School for International Health; Kate Hadley, Memorial University of Newfoundland; Dalila Aguilar, Michigan State University, College of Human Medicine; Emily Antoon, Michigan State University, College of Human Medicine; Sadie Bush, Michigan State University, College of Human Medicine; Julie Celebi, Michigan State University, College of Human Medicine; Alisan Fathalizadeh, Michigan State University, College of Human Medicine; Janine Ghannam, Michigan State University, College of Human Medicine; Jonathan Krauss, Michigan State University, College of Human Medicine; Colleen Lane, Michigan State University, College of Human Medicine; Emily Olenzek, Michigan State University, College of Human Medicine; Catherine Pokropek, Michigan State University, College of Human Medicine; Jennifer Wilson, Michigan State University, College of Human Medicine; Melanie Ecung, Morehouse School of Medicine; Vivek Sambhara, Morehouse School of Medicine; Sarah Ann Anderson, Mount Sinai School of Medicine; Demetri Blanas, Mount Sinai School of Medicine; Andrew Chow, Mount Sinai School of Medicine; Thomas Emily, Mount Sinai School of Medicine; Jonathan Giftos, Mount Sinai School of Medicine; Melike Harfouche, Mount Sinai School of Medicine; Andrew Jensen, Mount Sinai School of Medicine; Zoe Kiefer, Mount Sinai School of Medicine; Eduardo LaCalle, Mount Sinai School of Medicine; Ursula Lang, Mount Sinai School of Medicine; Alexandra Leader, Mount Sinai School of Medicine; Monica Li, Mount Sinai School of Medicine; Pooja Mehta, Mount Sinai School of Medicine; Paul Ogando, Mount Sinai School of Medicine; Matthew Rogers, Mount Sinai School of Medicine; Prasad Shirvalkar, Mount Sinai School of Medicine; Rachel Shively, Mount Sinai School of Medicine; Portal Luis, National University; Farhan Karim, New York College of Osteopathic Medicine; Dan Murphy, New York College of Osteopathic Medicine; Sam Nia, New York Medical College; Sundeep Singh, New York Medical College; Cindy Wu, New York Medical College; Miriam Orcutt, Newcastle University; Jessie Grewal, Northwestern University Feinberg School of Medicine; Maria Ghaus, Nottingham; Nadim Jaber, Nova Southeastern University College of Osteopathic Medicine; Latif Nahian, Nova Southeastern University College of Osteopathic Medicine; Wendy Song, Nova Southeastern University College of Osteopathic Medicine; Gautam Mankaney, Ohio State University College of Medicine; Imran Akbar, Ohio State University College of Osteopathic Medicine; Anthony Avnaim, Ohio State University College of Osteopathic Medicine; Jose Bustillo, Ohio State University College of Osteopathic Medicine; Elizabeth Gomes, Ohio State University College of Osteopathic Medicine; Jones Katherine, Ohio State University College of Osteopathic Medicine; Brenton McCoy, Ohio State University College of Osteopathic Medicine; Catalina Soto, Ohio State University College of Osteopathic Medicine; Darshini Trivedi, Ohio State University College of Osteopathic Medicine; Stephanie Urban, Ohio State University College of Osteopathic Medicine; Peng Wang, Ohio State University College of Osteopathic Medicine; Brandon Green, Oklahoma State University College of Osteopathic Medicine; Erin Fitch, Oregon Health and Science University; Emily Pratt, Oregon Health and Science University; Rebecca Richards, Oregon Health and Science University; Tasawur Hussain, Peninsula Medical School, UK; Paul Reidy, Peninsula Medical School, UK; Melanie Andrews, Penn State University College of Medicine; Olivier Rolin, Penn State University College of Medicine; Barry Sexton, Penn State University College of Medicine; Sural Shah, Penn State University College of Medicine; Gemma Owens, Queen's University, Belfast; Jesleen Rana, Queen's University, Belfast; Hasan Sheikh, Queen's University, Belfast; Arif Khan, SABA University School of Medicine; Nima Sheth, Saint Louis University; Gemmie Devera, San Juan Bautista School of Medicine; Emilio Garcia, San Juan Bautista School of Medicine; Matthew Pflaum, San Juan Bautista School of Medicine; Poroshat Shekarloo, San Juan Bautista School of Medicine; Nadia Ali, Southern Illinois University School of Medicine; Jehu Strange, Southern Illinois University School of Medicine; Tania Maria Caballero, St. George's University School of Medicine; George Dekki, St. George's University School of Medicine; Vijan Joshi, St. George's University School of Medicine; Aisha Qazi, St. Matthews University of Medicine; Shushmita Ahmed, Stanford University School

of Medicine; Ronald Alfa, Stanford University School of Medicine; Shah Ali, Stanford University School of Medicine; Patrick Avila, Stanford University School of Medicine; Chloe Chien, Stanford University School of Medicine; Christina Gamba, Stanford University School of Medicine; Joshua Goldner, Stanford University School of Medicine; Danica Lomeli, Stanford University School of Medicine; Jessica Tsai, Stanford University School of Medicine; Gloria Yiu Yiu, Stanford University School of Medicine; Jessica Bloome, State University of New York, Downstate College of Medicine; Tanzina Siddique, State University of New York, Downstate College of Medicine; Tajani Azeem, Texas A&M Health Sciences Center; Jessy Mathews, Texas Tech University Health Sciences Center; Nabeel Uwaydah, The University of Texas Medical Branch; Faheem Ejaz, Touro College of Osteopathic Medicine, New York; Christopher Evans, Touro College of Osteopathic Medicine, New York; Lara Farhat, Touro College of Osteopathic Medicine, New York; Daniel Galante, Touro College of Osteopathic Medicine, New York; Shrestha Himal, Touro College of Osteopathic Medicine, New York; Hassan Kidwai, Touro College of Osteopathic Medicine, New York; Chris McKinless, Touro College of Osteopathic Medicine, New York; Khurram Mehtabdin, Touro College of Osteopathic Medicine, New York; Omar Mirza, Touro College of Osteopathic Medicine, New York; Rikki Morris, Touro College of Osteopathic Medicine, New York; Carolyn Newman, Touro College of Osteopathic Medicine, New York; Kevin Pacheco, Touro College of Osteopathic Medicine, New York; Roger Louie Palisoc, Touro College of Osteopathic Medicine, New York; Punam Patel, Touro College of Osteopathic Medicine, New York; Shyam Patel, Touro College of Osteopathic Medicine, New York; Aishah Raffee, Touro College of Osteopathic Medicine, New York; Neha Sharma, Touro College of Osteopathic Medicine, New York; Rahul Sharma, Touro College of Osteopathic Medicine, New York; Amir Siddiqui, Touro College of Osteopathic Medicine, New York; Nora Toma, Touro College of Osteopathic Medicine, New York; Wei-Lin Yang, Touro College of Osteopathic Medicine, New York; Brian Yoon, Touro College of Osteopathic Medicine, New York; Moxie Jean Stratton, Touro University CA College of Osteopathic Medicine; Marco Cornelio, Tufts University School of Medicine; Cristin O'Grady, Tufts University School of Medicine; Soumitra Rajagopal, Tufts University School of Medicine; Elizabeth Samuels, Tufts University School of Medicine; Hanni Stoklosa, Tufts University School of Medicine; Maithri Ameresekere, Tufts University School of Medicine; Latrice Akuamoah, Tulane School of Medicine; Uzair Sarmast, UMDNJ-New Jersey Medical School; Uzair Sarmast, UMDNJ-New Jersey Medical School; Kelvin Adjei-Twum, UMDNJ-Robert Wood Johnson Medical School; Noha Aljawhary, UMDNJ-Robert Wood Johnson Medical School; Danit Brahver, UMDNJ-Robert Wood Johnson Medical School; Mindy Brittner, UMDNJ-Robert Wood Johnson Medical School; Stephanie Burgos, UMDNJ-Robert Wood Johnson Medical School; Daniel Connors, UMDNJ-Robert Wood Johnson Medical School; Tarik Hashem, UMDNJ-Robert Wood Johnson Medical School; Sonja Jasani, UMDNJ-Robert Wood Johnson Medical School; Selan Jeffrey, UMDNJ-Robert Wood Johnson Medical School; Sirisha Jonnalagadda, UMDNJ-Robert Wood Johnson Medical School; Wajdi Kanj, UMDNJ-Robert Wood Johnson Medical School; Rula Kanj, UMDNJ-Robert Wood Johnson Medical School; Diane Krutzler, UMDNJ-Robert Wood Johnson Medical School; Nayo Matthews, UMDNJ-Robert Wood Johnson Medical School; Shazia Mehmood, UMDNJ-Robert Wood Johnson Medical School; Arpit Patel, UMDNJ-Robert Wood Johnson Medical School; Christopher Potestio, UMDNJ-Robert Wood Johnson Medical School; Shayyan Rashid, UMDNJ-Robert Wood Johnson Medical School; Muhammad Shafqet, UMDNJ-Robert Wood Johnson Medical School; Rehan Shamim, UMDNJ-Robert Wood Johnson Medical School; Madeline Sterling, UMDNJ-Robert Wood Johnson Medical School; Wan-Ju Wu, UMDNJ-Robert Wood Johnson Medical School; Ana Leonor Zamora Sarabia, Universidad Autónoma de Madrid; Andrea Srur, Universidad Mayor; Lourdes I. Rodriguez-Reyes, University College Cork, Ireland; Jessie Breton, University of Alberta; Shehran Islam, University of Arizona College of Medicine; Kareem Kassel, University of Arizona College of Medicine; Travis Powell, University of Arizona College of Medicine; Emily Shortridge, University of Arizona College of Medicine; Currie Jonathan, University of Bristol Medical School; Hisham Assem, University of Calgary Faculty of Medicine; Pooja Das, University of Calgary Faculty of Medicine; Mollie Ferris, University of Calgary Faculty of Medicine; Daniel Girgis, University of Calgary Faculty of Medicine; Vera Krejčík, University of Calgary Faculty of Medicine; Meira Louis, University of Calgary Faculty of Medicine; John MacDonald, University of Calgary Faculty of Medicine; Christine O'Reilly, University of Calgary Faculty of Medicine; Navjeet Uppal, University of Calgary Faculty of Medicine; Michael Vance, University of Calgary Faculty of Medicine; Emma Witney, University of Calgary Faculty of Medicine; Elisabeth Malin, University of California Davis School of Medicine; Erin Crawford, University of California San Francisco School of Medicine; Rebecca Falik, University of California San Francisco School of Medicine; Tanzib Hossain, University of California San Francisco School of Medicine; Imran Khan, University of California San Francisco School of Medicine; Robert Lerrigo, University of California San Francisco School of Medicine; Rebecca Mitchell, University of California San Francisco School of Medicine; Jennifer Stella, University of California San Francisco School of Medicine; Meghan Woods, University of California San Francisco School of Medicine; Elaine Lin, University of Chicago Pritzker School of Medicine; Zach Rosner, University of Chicago Pritzker School of Medicine; Niekoo Abbasian, University of Illinois at Chicago College of Medicine; Osamah Abdallah, University of Illinois at Chicago College of Medicine; Yalda Afshar, University of Illinois at Chicago College of Medicine; Aisha Ahmed, University of Illinois at Chicago College of Medicine; Jihan Akhtar, University of Illinois at Chicago College of Medicine; Omar Al-Heeti, University of Illinois at Chicago College of Medicine; Kasim Ali, University of Illinois at Chicago College of Medicine; Khan Bilal, University of Illinois at Chicago College of Medicine; Anita Bordoloi, University of Illinois at Chicago College of Medicine; Patricia Chico, University of Illinois at Chicago College of Medicine; Bart Chwalisz, University of Illinois at Chicago College of Medicine; Tina Damarjian, University of Illinois at Chicago College of Medicine; Valentina Dehghan, University of Illinois at Chicago College of Medicine; Amish Desai, University of Illinois at Chicago College of Medicine; Kate Dickson, University of Illinois at Chicago College of Medicine; Evelyn Fakhoury, University of Illinois at Chicago College of Medicine; Asim Farooq, University of Illinois at Chicago College of Medicine; Ben Goold, University of Illinois at Chicago College of Medicine; Nuzhath Hussain, University of Illinois at Chicago College of Medicine; Sheetal Joshipura, University of Illinois at Chicago College of Medicine; Lauren Kendall, University of Illinois at Chicago College of Medicine; Adam Kost, University of Illinois at Chicago College of Medicine; Azhar Kothawala, University of Illinois at Chicago College of Medicine; Jalene Lanter, University of Illinois at Chicago College of Medicine; David Liss, University of Illinois at Chicago College of Medicine; Maham Lodhi, University of Illinois at Chicago College of Medicine; Juliana Lopez, University of Illinois at Chicago College of Medicine; Jing Luo, University of Illinois at Chicago College of Medicine; Prat Majumder, University of Illinois at Chicago College of Medicine; Prat Majumder, University of Illinois at Chicago College of Medicine; Irida Nikolla, University of Illinois at Chicago College of Medicine; Caroline Novak, University of Illinois at Chicago College of Medicine; Manish Pant, University of Illinois at Chicago College of Medicine; Sully Paz, University of Illinois at Chicago College of Medicine; Archana Radhakrishnan, University of Illinois at Chicago College of Medicine; Rishi Rattan, University of Illinois at Chicago College of Medicine; Michael Richards, University of Illinois at Chicago College of Medicine; Alhadi Sameir, University of Illinois at Chicago College of Medicine; Shreya Sengupta, University of Illinois at Chicago College of Medicine; Shannon Staley, University of Illinois at Chicago College of Medicine; Stephen Strock, University of Illinois at Chicago College of Medicine; Ashley Styczynski, University of Illinois at Chicago College of Medicine; Mara Terras, University of Illinois at Chicago College of Medicine; Lauren Teverbaugh, University of Illinois at Chicago College of Medicine; Crystal Yu, University of Illinois at Chicago College of Medicine; Dania Dia, University of Illinois at Urbana College of Medicine; Hiba Dia, University of Illinois College of Dentistry; Krishna Iyer, University of Iowa; Natasha Ahmed, University of Kansas School of Medicine; Grecori Anderson, University of Kansas School of Medicine; Ami Rughani, University of Kansas School of

Medicine; Sara Simons, University of Kansas School of Medicine; Justin Steinert, University of Kansas School of Medicine; James Chan, University of Leeds, UK; farhaanah kadri, University of Leicester; Saadnah Naidu, University of Leicester; Javeria Peracha, University of Leicester; Sabira Somani, University of Leicester; Aqeelah Yusuf, University of Leicester; Nafeesa Khanum, University of Leicester; Nafeesa Ramzan, University of Manchester; Aliye Runyan, University of Miami Miller School of Medicine; Ekua Abban, University of Michigan Medical School; Heba Abu-Isa, University of Michigan Medical School; Yasser Ads, University of Michigan Medical School; Katarzyna Bundrya, University of Michigan Medical School; Tej Desai, University of Michigan Medical School; Abdulrahman El-Sayed, University of Michigan Medical School; David Fang, University of Michigan Medical School; Huq Farhan, University of Michigan Medical School; Andrea Flynn, University of Michigan Medical School; Jeremy Fox, University of Michigan Medical School; Jessica Guh, University of Michigan Medical School; Reda Jaber, University of Michigan Medical School; Alisa Khan, University of Michigan Medical School; Xin Li, University of Michigan Medical School; Emily Little, University of Michigan Medical School; Ingrid Martin, University of Michigan Medical School; Jennifer McDonald, University of Michigan Medical School; Wajeehullah Muhammad, University of Michigan Medical School; Shaw Natsui, University of Michigan Medical School; Nabeel Obeid, University of Michigan Medical School; Sonali Palchadhuri, University of Michigan Medical School; Joshua Russell, University of Michigan Medical School; Linda Saab, University of Michigan Medical School; Zubair Sarmast, University of Michigan Medical School; Hasan Siddiqi, University of Michigan Medical School; Aristotle Sun, University of Michigan Medical School; Zoey Thill, University of Michigan Medical School; Angeline Ti, University of Michigan Medical School; Raza Zaidi, University of Michigan Medical School; Bryson Greenwood, University of North Carolina, Chapel Hill; A Watts, University of North Carolina, Chapel Hill; fizza mushtaq, University of Nottingham Medical School; Hanna Tilly, University of Nottingham Medical School; Sana Khan, University of Oklahoma; Samantha Green, University of Ottawa Faculty of Medicine; Fadi Hamadani, University of Ottawa Faculty of Medicine; Husna Husainy, University of Ottawa Faculty of Medicine; Lana Saciragic, University of Ottawa Faculty of Medicine; Rebecca Wallace, University of Ottawa Faculty of Medicine; Haley Moss, University of Pennsylvania School of Medicine; Andrew Renuart, University of Pennsylvania School of Medicine; Vineet Khanna, University of Pittsburgh School of Medicine; Dipesh Patel, University of Pittsburgh School of Medicine; Rehan Khan, University of South Carolina School of Medicine; Neil Chawla, University of Southern California Keck School Of Medicine; Bradley Postlethwaite, University of Tennessee School of Medicine; Duraini Mazen, University of Texas Health Science Center at San Antonio; Arielle Perez, University of Texas Health Science Center at San Antonio; Shannon Potter, University of Texas Health Science Center at San Antonio; Anna Powell, University of Texas Health Science Center at San Antonio; Emma Rodriguez, University of Texas Health Science Center at San Antonio; Feroze Sidhwa, University of Texas Health Science Center at San Antonio; Julie Stavinoha, University of Texas Health Science Center at San Antonio; Ami Waters, University of Texas Health Science Center at San Antonio; Elizabeth Zubowicz, University of Texas Health Science Center at San Antonio; Sara Ahmed, University of Toronto; Ishtiaq Ahmed, University of Toronto; Michele Askew, University of Toronto; Bharat Bahl, University of Toronto; Farah Bandukwala, University of Toronto; Diana Britch, University of Toronto; Cheryl Foo, University of Toronto; Michael Hill, University of Toronto; Nasir Khan, University of Toronto; Celine Kim, University of Toronto; Chris Kitamura, University of Toronto; Michaela Kopka, University of Toronto; Natalie Kozij, University of Toronto; Kim Le, University of Toronto; Erin McFadden, University of Toronto; Crystal Pinto, University of Toronto; Tara Rastgardani, University of Toronto; Roshan Razik, University of Toronto; Julie Thorne, University of Toronto; Ketan Vegda, University of Toronto; Robert Wu, University of Toronto; Eiman Zargaran, University of Toronto; Krishika Acharya, University of Virginia School of Medicine; Yemisi Afere, University of Virginia School of Medicine; Elizabeth Ames, University of Virginia School of Medicine; Hadi Anwar, University of Virginia School of Medicine; James Armontrout, University of Virginia School of Medicine; Anne Bowman, University of Virginia School of Medicine; Nicholas Buckwalter, University of Virginia School of Medicine; Tina Ho, University of Virginia School of Medicine; Nicole Kelleher, University of Virginia School of Medicine; Shawna Kettle, University of Virginia School of Medicine; Brian Long, University of Virginia School of Medicine; Kate Lurain, University of Virginia School of Medicine; William Miller, University of Virginia School of Medicine; Ryan Mlynarek, University of Virginia School of Medicine; Quang Nguyen, University of Virginia School of Medicine; Sarah Nie, University of Virginia School of Medicine; Kathleen Pridgen, University of Virginia School of Medicine; Thomas Quattlebaum, University of Virginia School of Medicine; Gauri Raval, University of Virginia School of Medicine; Marian Royer, University of Virginia School of Medicine; Tarleen Singh, University of Virginia School of Medicine; Rauda Tellawi, University of Virginia School of Medicine; JiaDe Yu, University of Virginia School of Medicine; Iwona Baran, University of Western Ontario, Schulich School of Medicine and Dentistry; Marty Bezaire, University of Western Ontario, Schulich School of Medicine and Dentistry; Anna Dabu, University of Western Ontario, Schulich School of Medicine and Dentistry; Tanya DeLyzer, University of Western Ontario, Schulich School of Medicine and Dentistry; Bill Dunlop, University of Western Ontario, Schulich School of Medicine and Dentistry; Manji Farah Naaz, University of Western Ontario, Schulich School of Medicine and Dentistry; Kate Hayman, University of Western Ontario, Schulich School of Medicine and Dentistry; Gillian Hewson, University of Western Ontario, Schulich School of Medicine and Dentistry; Lucas Kipp, University of Western Ontario, Schulich School of Medicine and Dentistry; Faruqa Ladha, University of Western Ontario, Schulich School of Medicine and Dentistry; Michelle Lau, University of Western Ontario, Schulich School of Medicine and Dentistry; Kathleen MacKeracher, University of Western Ontario, Schulich School of Medicine and Dentistry; Adeel Mahmood, University of Western Ontario, Schulich School of Medicine and Dentistry; Raza Naqvi, University of Western Ontario, Schulich School of Medicine and Dentistry; Puri Nitasha, University of Western Ontario, Schulich School of Medicine and Dentistry; Danyaal Raza, University of Western Ontario, Schulich School of Medicine and Dentistry; Mark Reddington, University of Western Ontario, Schulich School of Medicine and Dentistry; Wajid Sayeed, University of Western Ontario, Schulich School of Medicine and Dentistry; Sapna Sharma, University of Western Ontario, Schulich School of Medicine and Dentistry; Michael Slatnik, University of Western Ontario, Schulich School of Medicine and Dentistry; Zohair Syed, University of Western Ontario, Schulich School of Medicine and Dentistry; Jacqueline Wolting, University of Western Ontario, Schulich School of Medicine and Dentistry; Ahraaz Wyne, University of Western Ontario, Schulich School of Medicine and Dentistry; Kathryn Jacobson, University of Wisconsin School of Medicine and Public Health; Josh Reier, University of Wisconsin School of Medicine and Public Health; Aditi Ringwala, University of Wisconsin School of Medicine and Public Health; Julie Rivers, University of Wisconsin School of Medicine and Public Health; Megan Schultz, University of Wisconsin School of Medicine and Public Health; Erin Tromble, University of Wisconsin School of Medicine and Public Health; Victor Tseng, University of Wisconsin School of Medicine and Public Health; Merina Thomas, Vanderbilt Medical School; Kevin Dholaria, Virginia Commonwealth University School of Medicine; Ali Khan, Virginia Commonwealth University School of Medicine; Hager Said, Vrije Universiteit; Ahmad Alawneh, Wayne State University School of Medicine; Roba Alhasan, Wayne State University School of Medicine; Maha Alhuseini, Wayne State University School of Medicine; Ahmer Ali, Wayne State University School of Medicine; Ayad Alkhatib, Wayne State University School of Medicine; Riham Alwan, Wayne State University School of Medicine; Ayesha Arrine, Wayne State University School of Medicine; Erik Brown, Wayne State University School of Medicine; Stephanie Buck, Wayne State University School of Medicine; Roula Daher, Wayne State University School of Medicine; Anna Dobosz, Wayne State University School of Medicine; Yara Fardous, Wayne State University School of Medicine; Sayeeda Fatima, Wayne State University School of Medicine; Christopher Foucher, Wayne State University School of Medicine; Rhonda Garza, Wayne State University School of Medicine; Lubna Grewal, Wayne State University School of Medicine; Emily Ho,

Wayne State University School of Medicine; Abdullah Ibrahim, Wayne State University School of Medicine; Christopher Jentoft, Wayne State University School of Medicine; Yousef Kaid, Wayne State University School of Medicine; Jawad Khan, Wayne State University School of Medicine; Iyad Khourdaji, Wayne State University School of Medicine; Anika Kumar, Wayne State University School of Medicine; Ken Kuper, Wayne State University School of Medicine; Nicholas Lewis, Wayne State University School of Medicine; Cheryl Mensah, Wayne State University School of Medicine; Mira Mikati, Wayne State University School of Medicine; Azmath Mohammed, Wayne State University School of Medicine; Feras Mossa-Basha, Wayne State University School of Medicine; Andrea Munro, Wayne State University School of Medicine; Wasfeh Musheinish, Wayne State University School of Medicine; Nadia Obeid, Wayne State University School of Medicine; Maia Orabi, Wayne State University School of Medicine; Zuhair Peracha, Wayne State University School of Medicine; Leslie Phillips, Wayne State University School of Medicine; Geoffrey Potts, Wayne State University School of Medicine; Natalie Rizk, Wayne State University School of Medicine; Sobia Sadiq, Wayne State University School of Medicine; Hassen Saleh, Wayne State University School of Medicine; Rehab Shabana, Wayne State University School of Medicine; Qasim Shakeel, Wayne State University School of Medicine; Maryann Shango, Wayne State University School of Medicine; Mohammed Shenaq, Wayne State University School of Medicine; Richard Shoskey, Wayne State University School of Medicine; Harlori Tokhie, Wayne State University School of Medicine; Yasmin Tootl, Wayne State University School of Medicine; Gregory Bonci, Weill Cornell Medical College; Katharine Boyle, Weill Cornell Medical College; Carlo Canepa, Weill Cornell Medical College; Wesley Clark, Weill Cornell Medical College; Mina Farkhondeh, Weill Cornell Medical College; Amanda Green, Weill Cornell Medical College; Anastasia Grivoyannis, Weill Cornell Medical College; Kelly Harris, Weill Cornell Medical College; Jad Husseini, Weill Cornell Medical College; Nasim Khadem, Weill Cornell Medical College; Joon-Hyung Kim, Weill Cornell Medical College; Michael Klufas, Weill Cornell Medical College; Luz Liriano-Ward, Weill Cornell Medical College; Sabrina Mahil, Weill Cornell Medical College; Lena Makaroun, Weill Cornell Medical College; Erica Miller, Weill Cornell Medical College; Andrea Nelsen, Weill Cornell Medical College;

Siobhan O'Herron, Weill Cornell Medical College; Ankit Patel, Weill Cornell Medical College; Suchit Patel, Weill Cornell Medical College; Xiao Peng, Weill Cornell Medical College; Christin Price, Weill Cornell Medical College; Tara Rachakonda, Weill Cornell Medical College; Eugene Richardson, Weill Cornell Medical College; Landon Roussel, Weill Cornell Medical College; Sara Sani, Weill Cornell Medical College; Andre Shaffer, Weill Cornell Medical College; Kristi Shigyo, Weill Cornell Medical College; Lindsey Shultz, Weill Cornell Medical College; Nichole Smith, Weill Cornell Medical College; Marina Stasenik, Weill Cornell Medical College; Leeanne Stratton, Weill Cornell Medical College; Cora Walsh, Weill Cornell Medical College; Joshua Ewell, Western University of Health Sciences College of Osteopathic Medicine of the Pacific; Tariq Hilal, Western University of Health Sciences College of Osteopathic Medicine of the Pacific; Tariq Hilal, Western University of Health Sciences College of Osteopathic Medicine of the Pacific; Omer Jamal, Western University of Health Sciences College of Osteopathic Medicine of the Pacific; Sadiq Mirza, Western University of Health Sciences College of Osteopathic Medicine of the Pacific; Rabiah Zafar, Western University of Health Sciences College of Osteopathic Medicine of the Pacific; Bibhav Acharya, Yale University School of Medicine; Sumayya Ahmad, Yale University School of Medicine; Feras Akbik, Yale University School of Medicine; Sanjay Basu, Yale University School of Medicine; Ali Batouli, Yale University School of Medicine; Carl Berdahl, Yale University School of Medicine; Natasha Collins, Yale University School of Medicine; Daniel Duncan, Yale University School of Medicine; Jonathan Fu, Yale University School of Medicine; Ramy Goueli, Yale University School of Medicine; Jennifer Guo, Yale University School of Medicine; Omer Ibrahim, Yale University School of Medicine; Ravi Kavaseery, Yale University School of Medicine; Narae Ko, Yale University School of Medicine; Ninani Kombo, Yale University School of Medicine; Elizabeth Kvach, Yale University School of Medicine; Julia Lubsen, Yale University School of Medicine; Michael Otremba, Yale University School of Medicine; Kavita Radhakrishnan, Yale University School of Medicine; Sonja Rakowski, Yale University School of Medicine; Jocelyn Ronda, Yale University School of Medicine; Ryan Schwarz, Yale University School of Medicine; Michael Soule, Yale University School of Medicine; Heather Speller, Yale University School of Medicine; Jennifer Voorhees, Yale University School of Medicine.
